# Supplementary material for: The identification of a novel Sulfolobus islandicus CAMP-like peptide points to archaeal microorganisms as cell factories for the production of antimicrobial molecules
Source: PubMed Central journal article supplement (PMC4559164; doi:10.1186/s12934-015-0302-9), 2015-09-04

# Antimicrobial assay

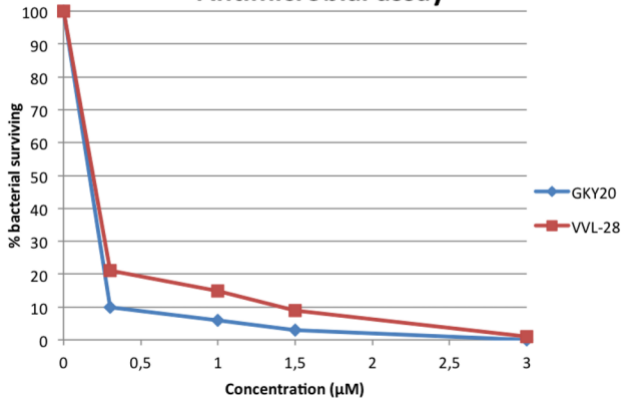

Supplement: 12934_2015_302_MOESM2_ESM.pdf [file 12934_2015_302_MOESM2_ESM.pdf]
